# Supplementary material
Source: MDPI journal article supplement (https://www.mdpi.com/1424-2818/15/4/487)
Supplement: s1 [file s1]

## Supplementary Material

**Table S1.** Variance inflation factors (VIF) for variables fit in ZIP GLMM. Variables with VIF >5 were removed prior to analyses.

| Term       | VIF  |
|------------|------|
| All        |      |
| Openness   | 1.02 |
| Vegetation | 1.01 |
| DA         | 1.09 |
| Human      | 1.05 |
| Traffic    | 1.06 |
| Reduced    |      |
| DA         | 1.05 |
| Human      | 1.04 |
| Traffic    | 1.06 |

**Table S2.** Total independent camera detections at sites of bridges and culverts:

| Bridges<br>and<br>culverts | Species |          |             |        |           | Total |
|----------------------------|---------|----------|-------------|--------|-----------|-------|
|                            | Masked  | Yellow-  | Leopard cat | Hog    | Malayan   |       |
|                            | Palm    | throated |             | Badger | Porcupine |       |
|                            | Civet   | marten   |             |        |           |       |
| 1                          | 0       | 0        | 0           | 0      | 0         | 0     |
| 2                          | 0       | 0        | 0           | 0      | 0         | 0     |
| 3                          | 1       | 0        | 0           | 0      | 0         | 1     |
| 4                          | 47      | 0        | 29          | 3      | 0         | 79    |
| 5                          | 0       | 1        | 0           | 0      | 0         | 1     |
| 6                          | 9       | 6        | 7           | 0      | 0         | 22    |
| 7                          | 1       | 0        | 0           | 0      | 1         | 2     |
| 8                          | 0       | 0        | 0           | 0      | 0         | 0     |
| 9                          | 10      | 0        | 2           | 0      | 0         | 12    |
| 10                         | 99      | 0        | 51          | 0      | 0         | 150   |
| 11                         | 0       | 0        | 0           | 0      | 0         | 0     |
| 12                         | 0       | 0        | 0           | 0      | 0         | 0     |
| 13                         | 0       | 0        | 0           | 0      | 0         | 0     |
| 14                         | 0       | 0        | 0           | 0      | 0         | 0     |
| 15                         | 0       | 0        | 0           | 0      | 0         | 0     |
| Total                      | 167     | 7        | 89          | 3      | 1         | 267   |

**Table S3.** Total independent camera detections at controls sites.

| Species |      |       |      |        |      |        |      |       |       |        |      |     |     |     |      |      |    |      |         |     |     |
|---------|------|-------|------|--------|------|--------|------|-------|-------|--------|------|-----|-----|-----|------|------|----|------|---------|-----|-----|
| Sit     | Leop | Malay | Asi  | Temmi  | Gold | Chest  | Mas  | Yell  | Siber | Sichua | Blue | For | Alp | Tuf | Reev | Bloo | Wi | Chin | Asiati  | Hog | To  |
| es      | ard  | an    | atic | nck's  | en   | nut-   | ked  | ow-   | ian   | n      | Eare | est | ine | ted | es's | d    | ld | ese  | c       | Bad | tal |
|         | Cat  | Porcu | Bla  | Tragop | Phea | throat | Pal  | throa | Wea   | Snu    | d    | Mu  | Mu  | Dee | Munt | Phea | Bo | Sero | Brush   | ger |     |
|         |      | pine  | ck   | an     | sant | ed     | m    | ted   | sel   | b-     | Phea | sk  | sk  | r   | jac  | sant | ar | w    | -tailed |     |     |
|         |      |       | Bea  |        |      | Partri | Cive | mart  |       | nos    | sant | Dee | Dee |     |      |      |    |      | Porcu   |     |     |
|         |      |       | r    |        |      | dge    | t    | en    |       | ed     |      | r   | r   |     |      |      |    |      | pine    |     |     |
|         |      |       |      |        |      |        |      |       |       | Mo     |      |     |     |     |      |      |    |      |         |     |     |
|         |      |       |      |        |      |        |      |       |       | nke    |      |     |     |     |      |      |    |      |         |     |     |
|         |      |       |      |        |      |        |      |       |       | y      |      |     |     |     |      |      |    |      |         |     |     |
| 1       | 0    | 0     | 0    | 0      | 0    | 1      | 0    | 0     | 0     | 0      | 0    | 0   | 0   | 19  | 3    | 15   | 0  | 0    | 0       | 0   | 38  |
| 2       | 0    | 1     | 0    | 4      | 25   | 0      | 0    | 1     | 0     | 0      | 3    | 0   | 0   | 12  | 9    | 21   | 0  | 2    | 0       | 0   | 78  |

|    |   |   |   |   |    |   |    |   |   |   |   |   |   |    |   |    |   |   |   |   |    |
|----|---|---|---|---|----|---|----|---|---|---|---|---|---|----|---|----|---|---|---|---|----|
| 3  | 1 | 0 | 2 | 4 | 0  | 0 | 0  | 1 | 0 | 0 | 2 | 0 | 0 | 3  | 0 | 26 | 1 | 3 | 1 | 0 | 44 |
| 4  | 1 | 0 | 0 | 6 | 2  | 0 | 0  | 0 | 0 | 0 | 1 | 0 | 0 | 5  | 1 | 20 | 0 | 1 | 0 | 0 | 37 |
| 5  | 3 | 7 | 0 | 1 | 0  | 1 | 1  | 1 | 2 | 1 | 0 | 0 | 0 | 4  | 0 | 33 | 0 | 3 | 0 | 0 | 57 |
| 6  | 0 | 0 | 0 | 1 | 0  | 0 | 0  | 2 | 0 | 2 | 0 | 0 | 0 | 7  | 1 | 24 | 1 | 2 | 0 | 0 | 40 |
| 7  | 0 | 0 | 2 | 4 | 11 | 0 | 0  | 0 | 4 | 0 | 0 | 0 | 1 | 13 | 1 | 22 | 1 | 1 | 0 | 0 | 60 |
| 8  | 2 | 1 | 0 | 2 | 1  | 1 | 11 | 3 | 1 | 3 | 0 | 1 | 0 | 9  | 0 | 10 | 0 | 1 | 0 | 1 | 47 |
| 9  | 0 | 1 | 1 | 1 | 0  | 1 | 1  | 0 | 1 | 3 | 0 | 0 | 0 | 1  | 0 | 16 | 0 | 1 | 0 | 0 | 27 |
| 10 | 1 | 0 | 0 | 0 | 0  | 0 | 0  | 1 | 1 | 1 | 1 | 0 | 0 | 16 | 0 | 14 | 0 | 3 | 0 | 0 | 38 |
| 11 | 0 | 0 | 0 | 2 | 0  | 0 | 2  | 1 | 5 | 0 | 1 | 0 | 0 | 2  | 2 | 24 | 2 | 0 | 1 | 0 | 42 |
| 12 | 0 | 0 | 2 | 2 | 2  | 0 | 1  | 1 | 0 | 1 | 0 | 0 | 0 | 5  | 2 | 23 | 2 | 0 | 0 | 0 | 41 |
| 13 | 2 | 0 | 0 | 1 | 0  | 1 | 0  | 0 | 0 | 0 | 0 | 0 | 0 | 13 | 0 | 6  | 0 | 2 | 0 | 2 | 27 |
| 14 | 2 | 0 | 1 | 7 | 14 | 0 | 1  | 0 | 0 | 0 | 0 | 0 | 0 | 9  | 3 | 3  | 0 | 1 | 0 | 0 | 41 |
| 15 | 0 | 0 | 0 | 1 | 8  | 2 | 0  | 0 | 0 | 1 | 0 | 0 | 0 | 11 | 7 | 5  | 1 | 1 | 0 | 1 | 38 |

|    |   |   |   |   |    |   |   |   |   |   |   |   |   |    |    |    |   |   |   |   |    |
|----|---|---|---|---|----|---|---|---|---|---|---|---|---|----|----|----|---|---|---|---|----|
| 16 | 2 | 0 | 0 | 1 | 0  | 1 | 0 | 0 | 0 | 1 | 0 | 1 | 0 | 9  | 0  | 9  | 2 | 2 | 0 | 2 | 30 |
| 17 | 0 | 2 | 0 | 2 | 0  | 0 | 0 | 1 | 0 | 0 | 0 | 0 | 0 | 3  | 1  | 24 | 0 | 1 | 0 | 0 | 34 |
| 18 | 0 | 0 | 2 | 5 | 15 | 3 | 0 | 0 | 1 | 1 | 0 | 0 | 0 | 12 | 11 | 20 | 1 | 0 | 0 | 0 | 71 |
| 19 | 0 | 0 | 0 | 0 | 0  | 0 | 0 | 0 | 0 | 0 | 0 | 1 | 0 | 1  | 0  | 13 | 0 | 0 | 0 | 0 | 15 |
| 20 | 0 | 0 | 0 | 3 | 0  | 1 | 0 | 0 | 0 | 3 | 0 | 0 | 0 | 6  | 0  | 12 | 0 | 0 | 0 | 0 | 25 |
| 21 | 0 | 0 | 1 | 2 | 0  | 2 | 0 | 0 | 0 | 0 | 0 | 0 | 0 | 8  | 0  | 9  | 1 | 0 | 0 | 0 | 23 |
| 22 | 0 | 0 | 0 | 0 | 0  | 2 | 0 | 0 | 6 | 0 | 0 | 0 | 0 | 2  | 0  | 13 | 0 | 0 | 0 | 0 | 23 |
| 23 | 2 | 0 | 1 | 1 | 0  | 0 | 0 | 1 | 1 | 0 | 0 | 0 | 0 | 6  | 0  | 9  | 0 | 0 | 0 | 0 | 21 |
| 24 | 0 | 0 | 0 | 0 | 0  | 0 | 0 | 1 | 0 | 3 | 0 | 0 | 0 | 1  | 0  | 10 | 2 | 1 | 0 | 3 | 21 |
| 25 | 0 | 0 | 0 | 0 | 0  | 1 | 0 | 1 | 0 | 0 | 0 | 0 | 0 | 12 | 1  | 17 | 5 | 1 | 0 | 0 | 38 |
| 26 | 0 | 0 | 7 | 4 | 2  | 0 | 3 | 0 | 0 | 0 | 2 | 0 | 0 | 0  | 2  | 10 | 0 | 0 | 0 | 0 | 30 |
| 27 | 2 | 1 | 3 | 1 | 0  | 0 | 0 | 0 | 0 | 0 | 0 | 0 | 0 | 12 | 0  | 2  | 3 | 1 | 0 | 0 | 25 |
| 28 | 0 | 0 | 0 | 0 | 0  | 2 | 0 | 0 | 1 | 0 | 6 | 0 | 0 | 7  | 0  | 12 | 0 | 0 | 0 | 0 | 28 |

[illegible]
